# Supplementary material for: Protein function prediction as approximate semantic entailment
Source: Springer Nature journal article supplement (doi:10.1038/s42256-024-00795-w), 2024-02-14
Supplement: 42256_2024_795_MOESM1_ESM.pdf [file 42256_2024_795_MOESM1_ESM.pdf]

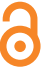

---

# Protein function prediction as approximate semantic entailment

---

In the format provided by the authors and unedited

---

## Appendix A Evaluation metrics

We use four different measures to evaluate the performance of our models. Three protein-centric measures  $F_{\max}$ ,  $S_{\min}$  and AUPR and one class-centric AUC.

$F_{\max}$  is a maximum protein-centric F-measure computed over all prediction thresholds. First, we compute average precision and recall using the following formulas:

$$pr_i(t) = \frac{\sum_f I(f \in P_i(t) \wedge f \in T_i)}{\sum_f I(f \in P_i(t))} \quad (\text{A1})$$

$$rc_i(t) = \frac{\sum_f I(f \in P_i(t) \wedge f \in T_i)}{\sum_f I(f \in T_i)} \quad (\text{A2})$$

$$AvgPr(t) = \frac{1}{m(t)} \cdot \sum_{i=1}^{m(t)} pr_i(t) \quad (\text{A3})$$

$$AvgRc(t) = \frac{1}{n} \cdot \sum_{i=1}^n rc_i(t) \quad (\text{A4})$$

where  $f$  is a GO class,  $T_i$  is a set of true annotations,  $P_i(t)$  is a set of predicted annotations for a protein  $i$  and threshold  $t$ ,  $m(t)$  is a number of proteins for which we predict at least one class,  $n$  is a total number of proteins and  $I$  is an indicator function which returns 1 if the condition is true and 0 otherwise. Then, we compute the  $F_{\max}$  for prediction thresholds  $t \in [0, 1]$  with a step size of 0.01. We count a class as a prediction if its prediction score is greater or equal than  $t$ :

$$F_{\max} = \max_t \left\{ \frac{2 \cdot AvgPr(t) \cdot AvgRc(t)}{AvgPr(t) + AvgRc(t)} \right\} \quad (\text{A5})$$

$S_{\min}$  computes the semantic distance between real and predicted annotations based on information content of the classes. The information content  $IC(c)$  is computed based on the annotation probability of the class  $c$ :

$$IC(c) = -\log(Pr(c|P(c))) \quad (\text{A6})$$

where  $P(c)$  is a set of parent classes of the class  $c$ . The  $S_{\min}$  is computed using the following formulas:

$$S_{\min} = \min_t \sqrt{ru(t)^2 + mi(t)^2} \quad (\text{A7})$$

where  $ru(t)$  is the average remaining uncertainty and  $mi(t)$  is average misinformation:

$$ru(t) = \frac{1}{n} \sum_{i=1}^n \sum_{c \in T_i - P_i(t)} IC(c) \quad (\text{A8})$$

$$mi(t) = \frac{1}{n} \sum_{i=1}^n \sum_{c \in P_i(t) - T_i} IC(c) \quad (\text{A9})$$

AUPR is the area under the average precision (*AvgPr*) and recall (*AvgRc*) curve.

AUC is a class-centric measure where compute AUC ROC per each class and take the average.

## Appendix B ELEmbeddings loss functions

We use the Adam optimizer to minimize the following loss function:

$$L = \frac{1}{N} \sum_{i=1}^N BCELoss(y_{c_i}, y'_{c_i}) + L_{NF1} + L_{NF2} + L_{NF3} + L_{NF4} \quad (\text{B10})$$

ELEmbeddings normalizes TBox axioms in one of the following four normal forms:

*NF1*:  $C \sqsubseteq D$ , e.g., *binding* (GO:0005488) SubClassOf: *molecular function* (GO:0003674)

*NF2*:  $C \sqcap D \sqsubseteq E$ , e.g., *cutinase activity* (GO:0050525) and *biological regulation* (GO:0065007) SubClassOf: *positive regulation of protein kinase B signaling* (GO:0051897)

*NF3*:  $C \sqsubseteq \exists R.D$ , e.g., *positive regulation of arginine biosynthetic process* (GO:1900080) SubClassOf: *positively regulates* (RO:0002213) some *arginine biosynthetic process* (GO:0006526)

*NF4*:  $\exists R.C \sqsubseteq D$ , e.g., *part of* (BFO:0000050) some *conjugation* (GO:0000746) SubClassOf: *mammary stem cell proliferation* (GO:0002174)

where  $C, D, E$  represent classes and  $R$  represents a relation in the ontology. We convert the GO axioms into these four normal forms using a set of conversion rules implemented in the JCel reasoner. As a result, we obtain a set of axioms all of which are in one of these four normal forms, and which are equivalent to the axioms in GO. ELEmbeddings uses these normalized GO axioms as constraints and projects each GO class into an  $n$ -ball (represented as a center point in  $n$ -dimensional space and a radius) and each relation as a transformation within  $n$ -dimensional space. We set the dimension  $n$  to 1024 so that it is the same as our protein embeddings. The losses for each of the normal forms are:

$$L_{NF1} = \frac{1}{|NF1|} \sum_{c,d \in NF1} \max(0, \|f_\eta(c) - f_\eta(d)\| + r_\eta(c) - r_\eta(d) - \gamma) \quad (\text{B11})$$

This loss goes to zero when the  $n$ -ball for class  $c$  is inside the  $n$ -ball for class  $d$  for all axioms of the first normal form.

$$L_{NF2} = \frac{1}{|NF2|} \sum_{c,d,e \in NF2} \max(0, \|f_\eta(c) - f_\eta(d)\| - r_\eta(c) - r_\eta(d) - \gamma) + \max(0, \|f_\eta(c) - f_\eta(e)\| - r_\eta(c) - \gamma) + \max(0, \|f_\eta(d) - f_\eta(e)\| - r_\eta(c) - \gamma) + \max(0, \min(r_\eta(c), r_\eta(d)) - r_\eta(e) - \gamma) \quad (\text{B12})$$

| Method 1     | Method 2   | MFO                | BPO                 |
|--------------|------------|--------------------|---------------------|
| DeepGO-SE    | DeepGOCNN  | $5 \cdot 10^{-06}$ | $4 \cdot 10^{-86}$  |
| DeepGO-SE    | DeepGOZero | $3 \cdot 10^{-12}$ | $2 \cdot 10^{-169}$ |
| DeepGO-SE    | Tale       | $5 \cdot 10^{-07}$ | $2 \cdot 10^{-185}$ |
| DeepGO-SE    | SPROF-GO   | $1 \cdot 10^{-03}$ | $7 \cdot 10^{-39}$  |
| DeepGO-SE    | MLP (ESM2) | 1.00               | 0.10                |
| DeepGO-SE    | MLP        | $4 \cdot 10^{-20}$ | 0.00                |
| DeepGO-SE    | Naive      | $2 \cdot 10^{-28}$ | 0.00                |
| DeepGOGAT-SE | DeepGOCNN  | 0.29               | $2 \cdot 10^{-76}$  |
| DeepGOGAT-SE | DeepGOZero | $1 \cdot 10^{-05}$ | $8 \cdot 10^{-153}$ |
| DeepGOGAT-SE | Tale       | 0.18               | $1 \cdot 10^{-163}$ |
| DeepGOGAT-SE | SPROF-GO   | 1.00               | $3 \cdot 10^{-28}$  |
| DeepGOGAT-SE | MLP (ESM2) | $6 \cdot 10^{-04}$ | $4 \cdot 10^{-04}$  |
| DeepGOGAT-SE | MLP        | $3 \cdot 10^{-11}$ | 0.00                |
| DeepGOGAT-SE | Naive      | $8 \cdot 10^{-17}$ | 0.00                |

**Table D1:** Wilcoxon signed rank-test p-values after Bonferroni correction for multiple testing using neXtProt dataset.

This loss minimizes the distance between intersection of  $n$ -balls for  $c$  and  $d$  and  $n$ -ball for class  $e$ .

$$L_{NF3} = \frac{1}{|NF3|} \sum_{r,c,d \in NF3} \max(0, \|f_\eta(c) - f_\eta(r) - f_\eta(d)\| - r_\eta(c) - r_\eta(d) - \gamma) \quad (\text{B13})$$

Here, we translate the  $n$ -ball for class  $d$  using relation vector  $r$  and minimize the non-overlap between the translated  $n$ -ball and the  $n$ -ball for class  $c$ .

$$L_{NF4} = \frac{1}{|NF4|} \sum_{c,r,d \in NF4} \max(0, \|f_\eta(c) + f_\eta(r) - f_\eta(d)\| + r_\eta(c) - r_\eta(d) - \gamma) \quad (\text{B14})$$

For the fourth normal form, the loss function translates the  $n$ -ball for class  $c$  using relation vector  $r$  and minimizes the distance between the  $n$ -balls so that the translated  $n$ -ball is inside the  $n$ -ball for class  $d$ .

We also use a loss for the concept assertion axiom  $C(p)$   $L_{C(p)} = \sigma(f_\eta(p) \cdot f_\eta(C)^T + r_\eta(C))$ ; as the GO does not contain individuals, we use this loss only as in Eqn. ?? for predicting functions of individual proteins.

The parameter  $\gamma$  is a margin parameter and  $\|\cdot\|$  is the  $L_2$  norm of the vectors. In addition, we use batch normalization for class embedding vectors to regularize the model and avoid overfitting. The normal form axioms and embeddings are generated jointly for all three sub-ontologies; however, we train and evaluate the function prediction models for each sub-ontology separately.

## Appendix C Supplementary figures

## Appendix D Supplementary tables

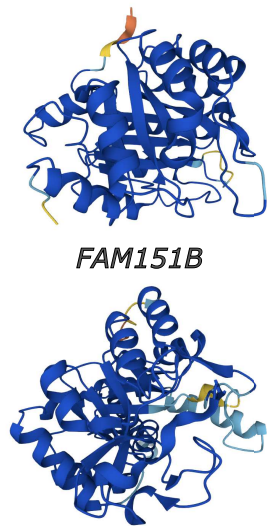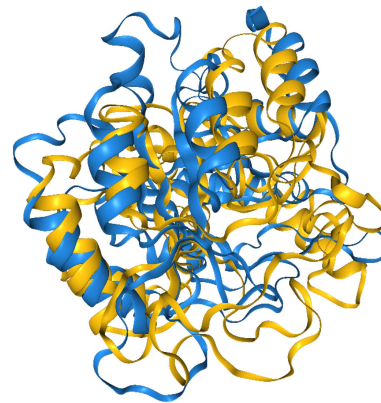

**Structural alignment**  
**RMSD: 9.77**  
**TM-Score: 0.42952**

***Lysophospholipase D GDPD3***

**Fig. C1:** Structural comparison between human proteins *FAM151B* and *Lysophospholipase D GDPD3*. Left: Ribbon diagrams of structures predicted by AlphaFold. The structures are colored according to the AlphaFold confidence score, the predicted local distance difference test (pLDDT), on a scale from 0 to 100. Dark blue: very high (> 90); light blue: high (70–90); yellow: low (50–70); orange: very low (< 50). Right: Structural superimposition by Foldseek, where *FAM151B* is shown in blue and *Lysophospholipase D GDPD3* is shown in gold. Search score is 1.0, RMSD is 9.77 and TM-Score is 0.42952.

| Method                         | $F_{\max}$   |              |              | $S_{\min}$    |               |              | AUPR         |              |              | AUC   |              |              |
|--------------------------------|--------------|--------------|--------------|---------------|---------------|--------------|--------------|--------------|--------------|-------|--------------|--------------|
|                                | MFO          | BPO          | CCO          | MFO           | BPO           | CCO          | MFO          | BPO          | CCO          | MFO   | BPO          | CCO          |
| ESM                            | 0.545        | 0.432        | 0.721        | 11.827        | 39.227        | 9.358        | 0.539        | 0.402        | 0.724        | 0.866 | 0.869        | 0.918        |
| ESM + GO axioms                | 0.549        | 0.426        | 0.719        | 11.876        | 39.749        | 9.462        | 0.539        | 0.394        | 0.721        | 0.868 | 0.859        | 0.913        |
| ESM + GO PLus axioms           | 0.552        | 0.426        | 0.717        | 11.750        | 39.686        | 9.645        | 0.550        | 0.393        | 0.728        | 0.867 | 0.861        | 0.907        |
| DeepGO-SE                      | <b>0.554</b> | 0.432        | 0.721        | 11.681        | 39.419        | 9.499        | <b>0.552</b> | 0.401        | 0.730        | 0.874 | 0.864        | 0.914        |
| ESM + GAT                      | 0.535        | 0.432        | 0.730        | 11.978        | 39.201        | 8.809        | 0.536        | 0.404        | 0.802        | 0.837 | <b>0.878</b> | 0.927        |
| ESM + GAT + GO axioms          | 0.521        | 0.430        | 0.727        | 12.229        | 39.460        | 8.743        | 0.516        | 0.398        | 0.733        | 0.860 | 0.873        | 0.927        |
| ESM + GAT + GO PLus axioms     | 0.517        | 0.432        | 0.731        | 12.321        | 39.382        | 8.706        | 0.513        | 0.400        | 0.735        | 0.855 | 0.861        | 0.923        |
| DeepGOGAT-SE                   | 0.525        | 0.435        | <b>0.736</b> | <b>11.137</b> | 39.123        | <b>8.634</b> | 0.523        | 0.404        | 0.743        | 0.861 | 0.876        | <b>0.930</b> |
| MF + GAT                       | -            | 0.453        | 0.671        | -             | <b>37.070</b> | 9.693        | -            | <b>0.430</b> | 0.721        | -     | 0.833        | 0.844        |
| MF + GAT + GO axioms           | -            | 0.444        | 0.666        | -             | 37.737        | 9.853        | -            | 0.428        | 0.713        | -     | 0.824        | 0.831        |
| MF + GAT + GO PLus axioms      | -            | 0.444        | 0.668        | -             | 37.649        | 9.803        | -            | 0.426        | 0.716        | -     | 0.827        | 0.832        |
| DeepGOGATMF-SE                 | -            | 0.448        | 0.668        | -             | 37.299        | 9.809        | -            | 0.428        | 0.679        | -     | 0.831        | 0.835        |
| MF-Pred + GAT                  | -            | <b>0.455</b> | 0.699        | -             | 38.943        | 9.868        | -            | 0.422        | <b>0.760</b> | -     | 0.864        | 0.895        |
| MF-Pred + GAT + GO axioms      | -            | 0.441        | 0.690        | -             | 39.328        | 10.031       | -            | 0.406        | 0.696        | -     | 0.852        | 0.876        |
| MF-Pred + GAT + GO PLus axioms | -            | 0.443        | 0.691        | -             | 39.705        | 10.003       | -            | 0.407        | 0.749        | -     | 0.853        | 0.881        |
| DeepGOGATMF-SE-Pred            | -            | 0.444        | 0.694        | -             | 39.098        | 9.907        | -            | 0.409        | 0.753        | -     | 0.855        | 0.884        |

**Table D2:** Ablation study to analyze contributions of GO and GOPlus ontology axioms, PPIs, experimental and predicted MF annotations, and Semantic Entailment to the performance

**Table D3:** Summary of the UniProtKB/Swiss-Prot dataset

| Ontology | GO Terms | Proteins | Groups | Training | Validation | Testing |
|----------|----------|----------|--------|----------|------------|---------|
| MFO      | 6,851    | 43,279   | 6,963  | 52,072   | 2,964      | 4,221   |
| BPO      | 21,356   | 58,729   | 9,463  | 52,584   | 2,870      | 3,275   |
| CCO      | 2,829    | 59,257   | 10,019 | 48,318   | 4,970      | 5,969   |

The table shows the number of GO terms, total number of proteins, number of groups of similar proteins, number of proteins in training, validation and testing sets for the UniProtKB/Swiss-Prot dataset.

| Axioms | Strategy | Models | $F_{max}$    |              |              | $S_{min}$     |               |              | AUPR         |              |              | AUC          |              |              |
|--------|----------|--------|--------------|--------------|--------------|---------------|---------------|--------------|--------------|--------------|--------------|--------------|--------------|--------------|
|        |          |        | MFO          | BPO          | CCO          | MFO           | BPO           | CCO          | MFO          | BPO          | CCO          | MFO          | BPO          | CCO          |
| GOPlus | min      | 1      | 0.526        | 0.448        | 0.700        | 11.071        | 38.842        | 9.716        | 0.516        | 0.417        | 0.707        | 0.864        | 0.870        | 0.912        |
|        |          | 2      | 0.530        | 0.447        | 0.701        | 11.029        | 38.699        | 9.685        | 0.522        | 0.419        | 0.712        | 0.867        | 0.872        | 0.914        |
|        |          | 3      | 0.530        | 0.446        | 0.700        | 11.010        | 38.666        | 9.709        | 0.523        | 0.420        | 0.715        | 0.868        | 0.872        | 0.915        |
|        |          | 4      | 0.529        | 0.446        | 0.701        | 10.997        | 38.724        | 9.695        | <b>0.524</b> | 0.419        | 0.717        | 0.869        | 0.872        | 0.916        |
|        |          | 5      | 0.529        | 0.446        | 0.701        | 10.999        | 38.679        | 9.676        | <b>0.524</b> | 0.419        | 0.719        | 0.874        | 0.872        | 0.916        |
|        |          | 6      | 0.531        | 0.446        | 0.701        | 11.007        | 38.655        | 9.698        | <b>0.524</b> | 0.419        | 0.719        | 0.874        | 0.872        | 0.915        |
|        |          | 7      | 0.529        | 0.446        | 0.700        | 11.047        | 38.744        | 9.704        | <b>0.524</b> | 0.419        | 0.720        | 0.874        | 0.872        | 0.915        |
|        |          | 8      | 0.527        | 0.446        | 0.701        | 11.046        | 38.710        | 9.692        | <b>0.524</b> | 0.419        | 0.720        | 0.875        | <b>0.873</b> | 0.915        |
|        |          | 9      | 0.528        | 0.444        | 0.701        | 11.044        | 38.773        | 9.679        | <b>0.524</b> | 0.418        | 0.721        | 0.874        | 0.872        | 0.915        |
|        |          | 10     | 0.527        | 0.444        | 0.702        | 11.053        | 38.806        | 9.676        | 0.523        | 0.419        | <b>0.722</b> | 0.874        | 0.872        | 0.915        |
|        | max      | 1      | 0.526        | 0.448        | 0.700        | 11.071        | 38.842        | 9.716        | 0.516        | 0.417        | 0.707        | 0.864        | 0.870        | 0.912        |
|        |          | 2      | 0.533        | 0.448        | 0.701        | 10.948        | 38.678        | 9.673        | 0.511        | 0.419        | 0.695        | 0.867        | 0.871        | 0.915        |
|        |          | 3      | 0.530        | 0.448        | 0.701        | 10.980        | 38.731        | 9.712        | 0.508        | 0.421        | 0.692        | 0.872        | 0.870        | 0.915        |
|        |          | 4      | 0.531        | 0.449        | 0.702        | 11.009        | 38.743        | 9.694        | 0.505        | 0.421        | 0.689        | 0.870        | 0.869        | 0.915        |
|        |          | 5      | 0.532        | 0.448        | 0.701        | 10.986        | 38.755        | 9.687        | 0.505        | 0.419        | 0.685        | 0.870        | 0.869        | 0.915        |
|        |          | 6      | 0.532        | 0.448        | 0.702        | 10.997        | 38.818        | 9.667        | 0.504        | 0.419        | 0.684        | 0.870        | 0.870        | 0.915        |
|        |          | 7      | 0.530        | 0.448        | 0.702        | 11.027        | 38.810        | 9.664        | 0.502        | 0.419        | 0.682        | 0.870        | 0.870        | 0.915        |
|        |          | 8      | 0.530        | 0.448        | 0.702        | 11.023        | 38.782        | 9.672        | 0.501        | 0.419        | 0.682        | 0.870        | 0.870        | 0.915        |
|        |          | 9      | 0.529        | 0.448        | 0.702        | 11.020        | 38.782        | 9.686        | 0.500        | 0.419        | 0.679        | 0.871        | 0.870        | 0.915        |
|        |          | 10     | 0.528        | 0.448        | 0.702        | 11.021        | 38.774        | 9.692        | 0.500        | 0.419        | 0.679        | 0.871        | 0.870        | 0.915        |
|        | avg      | 1      | 0.526        | 0.448        | 0.700        | 11.071        | 38.842        | 9.716        | 0.516        | 0.417        | 0.707        | 0.864        | 0.870        | 0.912        |
|        |          | 2      | 0.535        | 0.448        | 0.702        | 10.938        | 38.605        | 9.660        | 0.520        | 0.421        | 0.708        | 0.868        | 0.872        | 0.916        |
|        |          | 3      | <b>0.534</b> | 0.450        | 0.702        | 10.941        | 38.592        | 9.696        | 0.520        | 0.423        | 0.708        | 0.872        | 0.872        | 0.916        |
|        |          | 4      | <b>0.534</b> | 0.449        | 0.702        | <b>10.932</b> | 38.613        | 9.673        | 0.520        | 0.423        | 0.708        | 0.872        | 0.872        | 0.917        |
|        |          | 5      | 0.533        | 0.450        | 0.702        | 10.926        | 38.613        | 9.677        | 0.521        | 0.422        | 0.708        | 0.872        | 0.872        | <b>0.917</b> |
|        |          | 6      | 0.533        | 0.449        | 0.702        | 10.948        | 38.579        | 9.659        | 0.521        | 0.421        | 0.708        | 0.872        | <b>0.873</b> | <b>0.917</b> |
|        |          | 7      | 0.531        | 0.450        | 0.702        | 10.969        | 38.609        | 9.655        | 0.521        | 0.422        | 0.708        | 0.873        | <b>0.873</b> | <b>0.917</b> |
|        |          | 8      | 0.531        | 0.449        | 0.702        | 10.963        | 38.595        | 9.657        | 0.521        | 0.422        | 0.708        | 0.874        | <b>0.873</b> | <b>0.917</b> |
|        |          | 9      | 0.530        | 0.449        | 0.702        | 10.986        | 38.602        | 9.666        | 0.520        | 0.422        | 0.708        | 0.874        | <b>0.873</b> | <b>0.917</b> |
|        |          | 10     | 0.529        | 0.449        | <b>0.703</b> | 10.993        | 38.606        | 9.668        | 0.520        | 0.422        | 0.707        | 0.874        | <b>0.873</b> | <b>0.917</b> |
| GO     | min      | 1      | 0.523        | 0.446        | 0.702        | 11.137        | 38.838        | 9.656        | 0.508        | 0.417        | 0.698        | 0.871        | 0.868        | 0.913        |
|        |          | 2      | 0.519        | 0.449        | 0.701        | 11.190        | 38.746        | 9.683        | 0.514        | 0.420        | 0.702        | 0.876        | 0.869        | 0.911        |
|        |          | 3      | 0.518        | 0.448        | 0.700        | 11.186        | 38.746        | 9.699        | 0.511        | 0.421        | 0.709        | 0.875        | 0.869        | 0.910        |
|        |          | 4      | 0.520        | 0.449        | 0.700        | 11.176        | 38.650        | 9.684        | 0.515        | 0.423        | 0.715        | 0.875        | 0.871        | 0.910        |
|        |          | 5      | 0.519        | 0.449        | 0.700        | 11.153        | 38.688        | 9.668        | 0.515        | 0.423        | 0.716        | 0.876        | 0.871        | 0.910        |
|        |          | 6      | 0.520        | 0.448        | 0.700        | 11.150        | 38.708        | 9.668        | 0.516        | 0.423        | 0.717        | 0.875        | 0.871        | 0.910        |
|        |          | 7      | 0.520        | 0.447        | 0.701        | 11.135        | 38.799        | 9.652        | 0.517        | 0.422        | 0.717        | 0.876        | 0.871        | 0.910        |
|        |          | 8      | 0.520        | 0.448        | 0.701        | 11.141        | 38.774        | 9.664        | 0.518        | 0.422        | 0.717        | <b>0.877</b> | 0.872        | 0.910        |
|        |          | 9      | 0.519        | 0.447        | 0.701        | 11.170        | 38.822        | 9.660        | 0.517        | 0.421        | 0.721        | <b>0.877</b> | 0.872        | 0.910        |
|        |          | 10     | 0.519        | 0.448        | 0.702        | 11.170        | 38.819        | 9.664        | 0.518        | 0.422        | 0.721        | 0.876        | 0.872        | 0.909        |
|        | max      | 1      | 0.523        | 0.446        | 0.702        | 11.137        | 38.838        | 9.656        | 0.508        | 0.417        | 0.698        | 0.871        | 0.868        | 0.913        |
|        |          | 2      | 0.521        | 0.447        | 0.702        | 11.175        | 38.803        | 9.646        | 0.506        | 0.418        | 0.687        | 0.874        | 0.869        | 0.912        |
|        |          | 3      | 0.520        | 0.448        | 0.700        | 11.208        | 38.773        | 9.681        | 0.503        | 0.420        | 0.684        | 0.873        | 0.869        | 0.912        |
|        |          | 4      | 0.519        | 0.451        | 0.700        | 11.142        | 38.728        | 9.706        | 0.501        | 0.422        | 0.683        | 0.874        | 0.870        | 0.912        |
|        |          | 5      | 0.522        | 0.451        | 0.700        | 11.137        | 38.754        | 9.706        | 0.500        | 0.422        | 0.679        | 0.874        | 0.870        | 0.913        |
|        |          | 6      | 0.521        | 0.450        | 0.701        | 11.143        | 38.707        | 9.682        | 0.498        | 0.423        | 0.678        | 0.874        | 0.870        | 0.913        |
|        |          | 7      | 0.521        | 0.450        | 0.701        | 11.124        | 38.726        | 9.666        | 0.498        | 0.423        | 0.676        | 0.874        | 0.869        | 0.913        |
|        |          | 8      | 0.522        | 0.450        | 0.702        | 11.120        | 38.729        | 9.673        | 0.498        | 0.423        | 0.674        | 0.874        | 0.870        | 0.914        |
|        |          | 9      | 0.522        | 0.450        | 0.702        | 11.155        | 38.744        | 9.673        | 0.497        | 0.423        | 0.675        | 0.873        | 0.870        | 0.914        |
|        |          | 10     | 0.521        | 0.450        | 0.702        | 11.169        | 38.717        | 9.661        | 0.516        | 0.422        | 0.674        | 0.873        | 0.870        | 0.913        |
|        | avg      | 1      | 0.523        | 0.446        | 0.702        | 11.137        | 38.838        | 9.656        | 0.508        | 0.417        | 0.698        | 0.871        | 0.868        | 0.913        |
|        |          | 2      | 0.520        | 0.450        | 0.702        | 11.141        | 38.741        | 9.664        | 0.514        | 0.420        | 0.697        | 0.876        | 0.870        | 0.913        |
|        |          | 3      | 0.521        | 0.450        | 0.701        | 11.151        | 38.653        | 9.676        | 0.512        | 0.422        | 0.700        | 0.876        | 0.870        | 0.913        |
|        |          | 4      | 0.521        | 0.453        | 0.702        | 11.088        | <b>38.574</b> | 9.670        | 0.514        | <b>0.425</b> | 0.704        | 0.877        | 0.872        | 0.913        |
|        |          | 5      | 0.522        | 0.453        | 0.702        | 11.086        | 38.625        | 9.664        | 0.515        | <b>0.425</b> | 0.704        | 0.877        | 0.872        | 0.914        |
|        |          | 6      | 0.523        | <b>0.453</b> | 0.702        | 11.081        | 38.577        | 9.646        | 0.515        | <b>0.425</b> | 0.703        | <b>0.877</b> | 0.872        | 0.914        |
|        |          | 7      | 0.522        | 0.452        | 0.702        | 11.066        | 38.591        | <b>9.626</b> | 0.516        | <b>0.425</b> | 0.703        | <b>0.877</b> | 0.872        | 0.915        |
|        |          | 8      | 0.523        | 0.452        | 0.702        | 11.066        | 38.585        | 9.637        | 0.516        | <b>0.425</b> | 0.703        | <b>0.877</b> | 0.872        | 0.915        |
|        |          | 9      | 0.523        | 0.452        | 0.702        | 11.066        | 38.590        | 9.638        | 0.517        | <b>0.425</b> | 0.704        | <b>0.877</b> | 0.872        | 0.915        |
|        |          | 10     | 0.524        | 0.451        | 0.702        | 11.072        | 38.586        | 9.634        | 0.517        | <b>0.425</b> | 0.705        | <b>0.877</b> | 0.872        | 0.914        |

**Table D4:** Performance of semantic entailment depending on axioms, aggregation strategy and number of models for DeepGO-SE model

| Axioms | Strategy | Models | $F_{max}$    |              |              | $S_{min}$     |               |              | AUPR  |       |       | AUC   |       |       |
|--------|----------|--------|--------------|--------------|--------------|---------------|---------------|--------------|-------|-------|-------|-------|-------|-------|
|        |          |        | MFO          | BPO          | CCO          | MFO           | BPO           | CCO          | MFO   | BPO   | CCO   | MFO   | BPO   | CCO   |
| GO     | min      | 1      | 0.493        | 0.448        | 0.712        | 11.601        | 38.115        | 8.755        | 0.480 | 0.423 | 0.713 | 0.869 | 0.876 | 0.924 |
|        |          | 2      | 0.494        | 0.448        | 0.715        | 11.585        | 38.076        | 8.713        | 0.484 | 0.424 | 0.723 | 0.870 | 0.877 | 0.925 |
|        |          | 3      | 0.496        | 0.449        | 0.714        | 11.584        | 38.079        | 8.738        | 0.484 | 0.425 | 0.725 | 0.870 | 0.877 | 0.925 |
|        |          | 4      | 0.497        | 0.449        | 0.714        | 11.559        | 38.096        | 8.710        | 0.484 | 0.425 | 0.727 | 0.869 | 0.878 | 0.923 |
|        |          | 5      | 0.499        | 0.449        | 0.713        | 11.531        | 38.077        | 8.720        | 0.485 | 0.425 | 0.728 | 0.869 | 0.878 | 0.923 |
|        |          | 6      | 0.498        | 0.448        | 0.713        | 11.530        | 38.109        | 8.735        | 0.485 | 0.424 | 0.730 | 0.868 | 0.878 | 0.923 |
|        |          | 7      | 0.498        | 0.448        | 0.713        | 11.518        | 38.117        | 8.747        | 0.486 | 0.423 | 0.731 | 0.868 | 0.878 | 0.922 |
|        |          | 8      | 0.498        | 0.448        | 0.713        | 11.515        | 38.123        | 8.779        | 0.486 | 0.424 | 0.732 | 0.868 | 0.878 | 0.922 |
|        |          | 9      | 0.498        | 0.448        | 0.656        | 11.509        | 38.158        | 11.144       | 0.486 | 0.424 | 0.696 | 0.868 | 0.878 | 0.893 |
|        |          | 10     | 0.499        | 0.448        | 0.652        | 11.499        | 38.163        | 11.456       | 0.487 | 0.424 | 0.682 | 0.867 | 0.878 | 0.879 |
|        | max      | 1      | 0.493        | 0.448        | 0.712        | 11.601        | 38.115        | 8.755        | 0.480 | 0.423 | 0.713 | 0.869 | 0.876 | 0.924 |
|        |          | 2      | 0.500        | 0.450        | 0.715        | 11.506        | 38.072        | 8.706        | 0.483 | 0.424 | 0.706 | 0.870 | 0.877 | 0.926 |
|        |          | 3      | 0.499        | 0.449        | 0.714        | 11.528        | 38.074        | 8.726        | 0.482 | 0.423 | 0.703 | 0.871 | 0.878 | 0.928 |
|        |          | 4      | 0.500        | 0.451        | 0.715        | 11.504        | 38.070        | 8.718        | 0.482 | 0.424 | 0.699 | 0.871 | 0.878 | 0.928 |
|        |          | 5      | 0.499        | 0.450        | 0.714        | 11.520        | 38.104        | 8.727        | 0.480 | 0.423 | 0.697 | 0.869 | 0.878 | 0.927 |
|        |          | 6      | 0.500        | 0.450        | 0.714        | 11.528        | 38.143        | 8.731        | 0.480 | 0.423 | 0.696 | 0.869 | 0.878 | 0.927 |
|        |          | 7      | 0.501        | 0.450        | 0.713        | 11.523        | 38.146        | 8.785        | 0.480 | 0.423 | 0.693 | 0.870 | 0.878 | 0.928 |
|        |          | 8      | 0.501        | 0.450        | 0.713        | 11.516        | 38.195        | 8.792        | 0.480 | 0.423 | 0.691 | 0.870 | 0.879 | 0.928 |
|        |          | 9      | 0.501        | 0.450        | 0.694        | 11.526        | 38.215        | 9.095        | 0.478 | 0.422 | 0.667 | 0.869 | 0.879 | 0.898 |
|        |          | 10     | 0.500        | 0.450        | 0.694        | 11.540        | 38.228        | 9.115        | 0.478 | 0.422 | 0.664 | 0.870 | 0.879 | 0.894 |
|        | avg      | 1      | 0.493        | 0.448        | 0.712        | 11.601        | 38.115        | 8.755        | 0.480 | 0.423 | 0.713 | 0.869 | 0.876 | 0.924 |
|        |          | 2      | 0.498        | 0.449        | 0.715        | 11.532        | 38.019        | 8.684        | 0.486 | 0.425 | 0.718 | 0.871 | 0.878 | 0.927 |
|        |          | 3      | 0.498        | 0.450        | 0.715        | 11.483        | 37.984        | 8.681        | 0.487 | 0.426 | 0.719 | 0.872 | 0.879 | 0.928 |
|        |          | 4      | 0.500        | 0.451        | 0.715        | 11.469        | 37.930        | 8.664        | 0.488 | 0.426 | 0.720 | 0.872 | 0.879 | 0.928 |
|        |          | 5      | 0.500        | 0.450        | 0.715        | 11.448        | 37.934        | 8.672        | 0.488 | 0.426 | 0.720 | 0.871 | 0.879 | 0.928 |
|        |          | 6      | 0.500        | 0.450        | 0.715        | 11.446        | 37.998        | 8.655        | 0.488 | 0.425 | 0.721 | 0.871 | 0.879 | 0.928 |
|        |          | 7      | 0.502        | 0.450        | 0.715        | 11.431        | 37.987        | 8.678        | 0.489 | 0.425 | 0.720 | 0.871 | 0.879 | 0.929 |
|        |          | 8      | 0.502        | 0.450        | 0.715        | 11.432        | 37.981        | 8.691        | 0.489 | 0.425 | 0.720 | 0.871 | 0.880 | 0.929 |
|        |          | 9      | 0.502        | 0.450        | 0.714        | 11.421        | 37.975        | 8.710        | 0.489 | 0.425 | 0.724 | 0.871 | 0.880 | 0.918 |
|        |          | 10     | 0.502        | 0.451        | 0.712        | 11.419        | 37.970        | 8.731        | 0.490 | 0.425 | 0.769 | 0.872 | 0.880 | 0.915 |
| GOPlus | min      | 1      | 0.496        | 0.454        | 0.714        | 11.645        | 37.990        | 8.668        | 0.488 | 0.430 | 0.712 | 0.861 | 0.875 | 0.927 |
|        |          | 2      | 0.498        | 0.453        | 0.715        | 11.529        | 37.973        | 8.672        | 0.488 | 0.429 | 0.725 | 0.867 | 0.877 | 0.927 |
|        |          | 3      | 0.500        | 0.451        | 0.714        | 11.506        | 37.976        | 8.680        | 0.490 | 0.427 | 0.730 | 0.868 | 0.877 | 0.927 |
|        |          | 4      | 0.500        | 0.452        | 0.714        | 11.509        | 37.948        | 8.673        | 0.491 | 0.429 | 0.731 | 0.868 | 0.878 | 0.928 |
|        |          | 5      | 0.500        | 0.452        | 0.715        | 11.478        | 37.959        | 8.678        | 0.491 | 0.429 | 0.733 | 0.868 | 0.877 | 0.928 |
|        |          | 6      | 0.501        | 0.452        | 0.715        | 11.450        | 37.996        | 8.705        | 0.491 | 0.429 | 0.733 | 0.867 | 0.877 | 0.928 |
|        |          | 7      | 0.501        | 0.452        | 0.715        | 11.460        | 38.005        | 8.706        | 0.491 | 0.429 | 0.733 | 0.867 | 0.877 | 0.928 |
|        |          | 8      | 0.501        | 0.452        | 0.714        | 11.462        | 38.024        | 8.707        | 0.491 | 0.428 | 0.734 | 0.867 | 0.877 | 0.928 |
|        |          | 9      | 0.500        | 0.451        | 0.715        | 11.468        | 38.026        | 8.712        | 0.490 | 0.428 | 0.734 | 0.867 | 0.877 | 0.928 |
|        |          | 10     | 0.500        | 0.451        | 0.715        | 11.468        | 38.041        | 8.710        | 0.490 | 0.428 | 0.735 | 0.867 | 0.878 | 0.928 |
|        | max      | 1      | 0.496        | 0.454        | 0.714        | 11.645        | 37.990        | 8.668        | 0.488 | 0.430 | 0.712 | 0.861 | 0.875 | 0.927 |
|        |          | 2      | 0.501        | 0.454        | 0.714        | 11.527        | 37.988        | 8.672        | 0.489 | 0.429 | 0.708 | 0.865 | 0.878 | 0.928 |
|        |          | 3      | 0.502        | 0.454        | 0.715        | 11.498        | 37.982        | 8.665        | 0.489 | 0.428 | 0.703 | 0.866 | 0.879 | 0.928 |
|        |          | 4      | 0.503        | <b>0.456</b> | 0.715        | 11.477        | 37.930        | 8.662        | 0.489 | 0.429 | 0.701 | 0.866 | 0.880 | 0.929 |
|        |          | 5      | 0.504        | <b>0.456</b> | 0.715        | 11.494        | 37.959        | 8.683        | 0.487 | 0.429 | 0.699 | 0.867 | 0.880 | 0.929 |
|        |          | 6      | 0.502        | <b>0.456</b> | 0.715        | 11.504        | 37.954        | 8.692        | 0.485 | 0.429 | 0.697 | 0.867 | 0.880 | 0.929 |
|        |          | 7      | 0.502        | <b>0.456</b> | 0.715        | 11.523        | 37.967        | 8.726        | 0.484 | 0.429 | 0.696 | 0.868 | 0.880 | 0.929 |
|        |          | 8      | <b>0.503</b> | <b>0.456</b> | 0.715        | 11.514        | 37.988        | 8.732        | 0.485 | 0.429 | 0.695 | 0.868 | 0.879 | 0.928 |
|        |          | 9      | 0.504        | <b>0.456</b> | 0.715        | 11.512        | 37.975        | 8.741        | 0.485 | 0.429 | 0.694 | 0.867 | 0.880 | 0.928 |
|        |          | 10     | 0.504        | <b>0.456</b> | 0.715        | 11.519        | 37.958        | 8.742        | 0.484 | 0.429 | 0.693 | 0.867 | 0.880 | 0.928 |
|        | avg      | 1      | 0.496        | 0.454        | 0.714        | 11.645        | 37.990        | 8.668        | 0.488 | 0.430 | 0.712 | 0.861 | 0.875 | 0.927 |
|        |          | 2      | 0.501        | 0.454        | 0.715        | 11.491        | 37.950        | 8.609        | 0.492 | 0.430 | 0.719 | 0.867 | 0.879 | 0.928 |
|        |          | 3      | 0.501        | 0.454        | 0.716        | 11.452        | 37.911        | 8.629        | 0.492 | 0.429 | 0.720 | 0.868 | 0.880 | 0.929 |
|        |          | 4      | 0.502        | 0.455        | 0.716        | 11.411        | 37.833        | 8.616        | 0.494 | 0.432 | 0.722 | 0.869 | 0.881 | 0.929 |
|        |          | 5      | 0.502        | <b>0.456</b> | <b>0.717</b> | 11.409        | <b>37.811</b> | <b>8.607</b> | 0.494 | 0.432 | 0.722 | 0.869 | 0.881 | 0.929 |
|        |          | 6      | <b>0.503</b> | <b>0.456</b> | <b>0.717</b> | <b>11.404</b> | 37.817        | 8.618        | 0.494 | 0.432 | 0.722 | 0.870 | 0.881 | 0.929 |
|        |          | 7      | 0.502        | 0.455        | <b>0.717</b> | 11.443        | 37.839        | 8.624        | 0.494 | 0.432 | 0.722 | 0.870 | 0.881 | 0.929 |
|        |          | 8      | 0.502        | 0.455        | <b>0.717</b> | 11.450        | 37.829        | 8.643        | 0.494 | 0.431 | 0.722 | 0.870 | 0.880 | 0.929 |
|        |          | 9      | 0.502        | <b>0.456</b> | <b>0.717</b> | 11.461        | 37.820        | 8.639        | 0.493 | 0.431 | 0.722 | 0.869 | 0.880 | 0.929 |
|        |          | 10     | 0.502        | 0.455        | 0.716        | 11.447        | 37.827        | 8.654        | 0.493 | 0.431 | 0.722 | 0.869 | 0.881 | 0.929 |

**Table D5:** Performance of semantic entailment depending on axioms, aggregation strategy and number of models for DeepGOGAT-SE model



| Axioms | Strategy | Models | $F_{max}$    |       | $S_{min}$     |              | AUPR  |       | AUC   |       |       |
|--------|----------|--------|--------------|-------|---------------|--------------|-------|-------|-------|-------|-------|
|        |          |        | BPO          | CCO   | BPO           | CCO          | BPO   | CCO   | BPO   | CCO   |       |
| GO     | min      | 1      | 0.429        | 0.658 | 37.441        | 9.778        | 0.422 | 0.661 | 0.820 | 0.842 |       |
|        |          | 2      | 0.433        | 0.659 | 37.336        | 9.736        | 0.421 | 0.667 | 0.819 | 0.843 |       |
|        |          | 3      | 0.434        | 0.659 | 37.351        | 9.766        | 0.423 | 0.668 | 0.813 | 0.843 |       |
|        |          | 4      | 0.434        | 0.660 | 37.360        | 9.784        | 0.424 | 0.669 | 0.813 | 0.843 |       |
|        |          | 5      | 0.433        | 0.659 | 37.463        | 9.808        | 0.423 | 0.669 | 0.811 | 0.842 |       |
|        |          | 6      | 0.434        | 0.659 | 37.470        | 9.808        | 0.423 | 0.670 | 0.811 | 0.840 |       |
|        |          | 7      | 0.434        | 0.659 | 37.570        | 9.821        | 0.423 | 0.670 | 0.811 | 0.840 |       |
|        |          | 8      | 0.434        | 0.659 | 37.596        | 9.801        | 0.423 | 0.671 | 0.810 | 0.841 |       |
|        |          | 9      | 0.434        | 0.659 | 37.602        | 9.802        | 0.423 | 0.671 | 0.809 | 0.839 |       |
|        |          | 10     | 0.434        | 0.659 | 37.614        | 9.807        | 0.423 | 0.672 | 0.808 | 0.839 |       |
|        | max      | 1      | 0.429        | 0.658 | 37.441        | 9.778        | 0.422 | 0.661 | 0.820 | 0.842 |       |
|        |          | 2      | 0.436        | 0.658 | 37.445        | 9.749        | 0.425 | 0.658 | 0.824 | 0.845 |       |
|        |          | 3      | 0.443        | 0.657 | 37.384        | 9.839        | 0.427 | 0.654 | 0.825 | 0.847 |       |
|        |          | 4      | 0.445        | 0.657 | 37.399        | 9.833        | 0.426 | 0.652 | 0.825 | 0.849 |       |
|        |          | 5      | 0.446        | 0.657 | 37.389        | 9.818        | 0.425 | 0.651 | 0.824 | 0.848 |       |
|        |          | 6      | 0.447        | 0.657 | 37.521        | 9.824        | 0.425 | 0.651 | 0.825 | 0.848 |       |
|        |          | 7      | 0.447        | 0.657 | 37.574        | 9.843        | 0.425 | 0.698 | 0.824 | 0.848 |       |
|        |          | 8      | <b>0.448</b> | 0.657 | 37.615        | 9.851        | 0.424 | 0.697 | 0.824 | 0.848 |       |
|        |          | 9      | <b>0.448</b> | 0.658 | 37.682        | 9.848        | 0.424 | 0.697 | 0.823 | 0.848 |       |
|        |          | 10     | <b>0.448</b> | 0.658 | 37.733        | 9.857        | 0.424 | 0.697 | 0.823 | 0.849 |       |
|        | avg      | 1      | 0.429        | 0.658 | 37.441        | 9.778        | 0.422 | 0.661 | 0.820 | 0.842 |       |
|        |          | 2      | 0.431        | 0.660 | 37.268        | 9.726        | 0.419 | 0.665 | 0.824 | 0.845 |       |
|        |          | 3      | 0.433        | 0.659 | <b>37.146</b> | 9.743        | 0.423 | 0.664 | 0.825 | 0.847 |       |
|        |          | 4      | 0.432        | 0.660 | 37.175        | 9.752        | 0.422 | 0.665 | 0.825 | 0.848 |       |
|        |          | 5      | 0.432        | 0.660 | 37.201        | 9.753        | 0.421 | 0.665 | 0.825 | 0.848 |       |
|        |          | 6      | 0.432        | 0.660 | 37.185        | 9.765        | 0.421 | 0.664 | 0.826 | 0.847 |       |
|        |          | 7      | 0.432        | 0.660 | 37.170        | 9.768        | 0.421 | 0.664 | 0.826 | 0.847 |       |
|        |          | 8      | 0.432        | 0.660 | 37.182        | 9.765        | 0.421 | 0.664 | 0.826 | 0.849 |       |
|        |          | 9      | 0.432        | 0.659 | 37.192        | 9.771        | 0.421 | 0.664 | 0.825 | 0.847 |       |
|        |          | 10     | 0.432        | 0.660 | 37.196        | 9.763        | 0.421 | 0.664 | 0.824 | 0.848 |       |
|        | GOPlus   | min    | 1            | 0.428 | 0.658         | 37.313       | 9.809 | 0.414 | 0.659 | 0.823 | 0.847 |
|        |          |        | 2            | 0.429 | 0.659         | 37.344       | 9.779 | 0.417 | 0.665 | 0.822 | 0.847 |
|        |          |        | 3            | 0.431 | 0.659         | 37.340       | 9.789 | 0.420 | 0.668 | 0.821 | 0.842 |
|        |          |        | 4            | 0.432 | 0.659         | 37.368       | 9.776 | 0.420 | 0.670 | 0.820 | 0.841 |
|        |          |        | 5            | 0.432 | 0.659         | 37.440       | 9.763 | 0.420 | 0.671 | 0.819 | 0.840 |
|        |          |        | 6            | 0.432 | 0.659         | 37.511       | 9.755 | 0.421 | 0.672 | 0.818 | 0.839 |
|        |          |        | 7            | 0.433 | 0.660         | 37.495       | 9.752 | 0.421 | 0.672 | 0.816 | 0.839 |
|        |          |        | 8            | 0.434 | 0.660         | 37.511       | 9.765 | 0.421 | 0.673 | 0.816 | 0.839 |
|        |          |        | 9            | 0.434 | 0.660         | 37.545       | 9.773 | 0.422 | 0.673 | 0.815 | 0.839 |
|        |          |        | 10           | 0.434 | 0.660         | 37.553       | 9.779 | 0.422 | 0.673 | 0.815 | 0.839 |
| max    |          | 1      | 0.428        | 0.658 | 37.313        | 9.809        | 0.414 | 0.659 | 0.823 | 0.847 |       |
|        |          | 2      | 0.430        | 0.657 | 37.313        | 9.819        | 0.413 | 0.655 | 0.827 | 0.851 |       |
|        |          | 3      | 0.436        | 0.657 | 37.336        | 9.844        | 0.413 | 0.653 | 0.827 | 0.852 |       |
|        |          | 4      | 0.437        | 0.657 | 37.382        | 9.851        | 0.411 | 0.652 | 0.828 | 0.852 |       |
|        |          | 5      | 0.439        | 0.657 | 37.355        | 9.854        | 0.410 | 0.650 | 0.827 | 0.851 |       |
|        |          | 6      | 0.442        | 0.657 | 37.386        | 9.856        | 0.412 | 0.649 | 0.828 | 0.852 |       |
|        |          | 7      | 0.442        | 0.658 | 37.424        | 9.860        | 0.412 | 0.699 | 0.827 | 0.852 |       |
|        |          | 8      | 0.444        | 0.657 | 37.429        | 9.867        | 0.411 | 0.699 | 0.827 | 0.851 |       |
|        |          | 9      | 0.445        | 0.657 | 37.456        | 9.873        | 0.411 | 0.699 | 0.827 | 0.850 |       |
|        |          | 10     | 0.445        | 0.657 | 37.515        | 9.877        | 0.411 | 0.699 | 0.827 | 0.850 |       |
| avg    |          | 1      | 0.428        | 0.658 | 37.313        | 9.809        | 0.414 | 0.659 | 0.823 | 0.847 |       |
|        |          | 2      | 0.429        | 0.658 | 37.263        | 9.784        | 0.416 | 0.662 | 0.826 | 0.851 |       |
|        |          | 3      | 0.430        | 0.659 | 37.205        | 9.768        | 0.418 | 0.662 | 0.827 | 0.851 |       |
|        |          | 4      | 0.430        | 0.660 | 37.279        | 9.752        | 0.418 | 0.664 | 0.828 | 0.850 |       |
|        |          | 5      | 0.429        | 0.660 | 37.254        | 9.737        | 0.418 | 0.663 | 0.827 | 0.851 |       |
|        |          | 6      | 0.430        | 0.660 | 37.227        | 9.727        | 0.418 | 0.664 | 0.827 | 0.850 |       |
|        |          | 7      | 0.431        | 0.660 | 37.182        | <b>9.724</b> | 0.419 | 0.663 | 0.827 | 0.850 |       |
|        |          | 8      | 0.431        | 0.659 | 37.153        | 9.729        | 0.419 | 0.664 | 0.827 | 0.849 |       |
|        |          | 9      | 0.432        | 0.660 | 37.164        | 9.734        | 0.419 | 0.663 | 0.827 | 0.848 |       |
|        |          | 10     | 0.432        | 0.660 | 37.174        | 9.731        | 0.419 | 0.663 | 0.826 | 0.848 |       |

**Table D6:** Performance of semantic entailment depending on axioms, aggregation strategy and number of models for DeepGOGATMF-SE model

| Axioms | Strategy | Models | $F_{max}$ |       | $S_{min}$ |        | AUPR  |       | AUC   |       |
|--------|----------|--------|-----------|-------|-----------|--------|-------|-------|-------|-------|
|        |          |        | BPO       | CCO   | BPO       | CCO    | BPO   | CCO   | BPO   | CCO   |
| GO     | min      | 1      | 0.452     | 0.673 | 38.317    | 10.062 | 0.427 | 0.685 | 0.868 | 0.892 |
|        |          | 2      | 0.451     | 0.671 | 38.199    | 10.087 | 0.427 | 0.687 | 0.869 | 0.893 |
|        |          | 3      | 0.454     | 0.671 | 38.136    | 10.052 | 0.429 | 0.688 | 0.868 | 0.891 |
|        |          | 4      | 0.454     | 0.671 | 38.086    | 10.051 | 0.430 | 0.689 | 0.869 | 0.891 |
|        |          | 5      | 0.453     | 0.671 | 38.163    | 10.062 | 0.428 | 0.690 | 0.869 | 0.889 |
|        |          | 6      | 0.452     | 0.671 | 38.109    | 10.046 | 0.428 | 0.690 | 0.868 | 0.888 |
|        |          | 7      | 0.452     | 0.671 | 38.123    | 10.041 | 0.428 | 0.691 | 0.868 | 0.888 |
|        |          | 8      | 0.453     | 0.671 | 38.138    | 10.046 | 0.428 | 0.691 | 0.868 | 0.888 |
|        |          | 9      | 0.452     | 0.671 | 38.180    | 10.059 | 0.428 | 0.691 | 0.868 | 0.888 |
|        |          | 10     | 0.452     | 0.670 | 38.185    | 10.077 | 0.428 | 0.690 | 0.868 | 0.888 |
|        | max      | 1      | 0.452     | 0.673 | 38.317    | 10.062 | 0.427 | 0.685 | 0.868 | 0.892 |
|        |          | 2      | 0.451     | 0.674 | 38.405    | 10.011 | 0.426 | 0.681 | 0.869 | 0.897 |
|        |          | 3      | 0.454     | 0.674 | 38.353    | 10.036 | 0.429 | 0.679 | 0.870 | 0.898 |
|        |          | 4      | 0.453     | 0.673 | 38.439    | 10.076 | 0.429 | 0.676 | 0.870 | 0.900 |
|        |          | 5      | 0.453     | 0.675 | 38.587    | 10.093 | 0.428 | 0.676 | 0.870 | 0.900 |
|        |          | 6      | 0.453     | 0.675 | 38.551    | 10.127 | 0.427 | 0.676 | 0.870 | 0.900 |
|        |          | 7      | 0.452     | 0.674 | 38.653    | 10.136 | 0.426 | 0.675 | 0.869 | 0.900 |
|        |          | 8      | 0.452     | 0.673 | 38.742    | 10.172 | 0.426 | 0.674 | 0.869 | 0.898 |
|        |          | 9      | 0.452     | 0.674 | 38.813    | 10.164 | 0.425 | 0.674 | 0.869 | 0.898 |
|        |          | 10     | 0.452     | 0.673 | 38.890    | 10.163 | 0.424 | 0.673 | 0.868 | 0.898 |
|        | avg      | 1      | 0.452     | 0.673 | 38.317    | 10.062 | 0.427 | 0.685 | 0.868 | 0.892 |
|        |          | 2      | 0.452     | 0.673 | 38.271    | 10.007 | 0.427 | 0.686 | 0.870 | 0.897 |
|        |          | 3      | 0.454     | 0.674 | 38.188    | 9.990  | 0.430 | 0.686 | 0.871 | 0.898 |
|        |          | 4      | 0.454     | 0.673 | 38.177    | 9.987  | 0.430 | 0.686 | 0.871 | 0.899 |
|        |          | 5      | 0.454     | 0.673 | 38.201    | 9.992  | 0.430 | 0.687 | 0.872 | 0.900 |
|        |          | 6      | 0.454     | 0.674 | 38.124    | 10.007 | 0.429 | 0.686 | 0.872 | 0.900 |
|        |          | 7      | 0.454     | 0.674 | 38.092    | 9.998  | 0.429 | 0.686 | 0.872 | 0.899 |
|        |          | 8      | 0.454     | 0.674 | 38.121    | 9.996  | 0.429 | 0.686 | 0.872 | 0.899 |
|        |          | 9      | 0.454     | 0.673 | 38.171    | 9.991  | 0.429 | 0.686 | 0.872 | 0.899 |
|        |          | 10     | 0.454     | 0.673 | 38.187    | 9.996  | 0.429 | 0.686 | 0.871 | 0.898 |
| GOPlus | min      | 1      | 0.452     | 0.669 | 38.383    | 10.050 | 0.428 | 0.729 | 0.871 | 0.897 |
|        |          | 2      | 0.452     | 0.673 | 38.380    | 9.960  | 0.430 | 0.690 | 0.872 | 0.896 |
|        |          | 3      | 0.453     | 0.673 | 38.305    | 9.970  | 0.431 | 0.691 | 0.872 | 0.896 |
|        |          | 4      | 0.453     | 0.674 | 38.262    | 9.963  | 0.431 | 0.692 | 0.873 | 0.896 |
|        |          | 5      | 0.454     | 0.673 | 38.224    | 9.957  | 0.431 | 0.692 | 0.873 | 0.896 |
|        |          | 6      | 0.454     | 0.673 | 38.210    | 9.955  | 0.431 | 0.692 | 0.872 | 0.897 |
|        |          | 7      | 0.454     | 0.673 | 38.203    | 9.951  | 0.431 | 0.693 | 0.872 | 0.897 |
|        |          | 8      | 0.454     | 0.673 | 38.222    | 9.960  | 0.431 | 0.693 | 0.871 | 0.897 |
|        |          | 9      | 0.454     | 0.673 | 38.182    | 9.978  | 0.431 | 0.693 | 0.872 | 0.896 |
|        |          | 10     | 0.453     | 0.673 | 38.188    | 9.977  | 0.431 | 0.693 | 0.871 | 0.896 |
|        | max      | 1      | 0.452     | 0.669 | 38.383    | 10.050 | 0.428 | 0.729 | 0.871 | 0.897 |
|        |          | 2      | 0.453     | 0.672 | 38.705    | 10.028 | 0.428 | 0.730 | 0.872 | 0.897 |
|        |          | 3      | 0.453     | 0.673 | 38.895    | 10.046 | 0.428 | 0.731 | 0.871 | 0.897 |
|        |          | 4      | 0.453     | 0.672 | 38.958    | 10.087 | 0.427 | 0.730 | 0.871 | 0.898 |
|        |          | 5      | 0.453     | 0.671 | 38.972    | 10.112 | 0.427 | 0.730 | 0.871 | 0.897 |
|        |          | 6      | 0.453     | 0.672 | 39.066    | 10.097 | 0.426 | 0.730 | 0.871 | 0.898 |
|        |          | 7      | 0.453     | 0.672 | 39.080    | 10.077 | 0.426 | 0.730 | 0.871 | 0.898 |
|        |          | 8      | 0.452     | 0.672 | 39.108    | 10.085 | 0.426 | 0.730 | 0.871 | 0.898 |
|        |          | 9      | 0.452     | 0.671 | 39.273    | 10.088 | 0.426 | 0.730 | 0.871 | 0.898 |
|        |          | 10     | 0.451     | 0.671 | 39.288    | 10.098 | 0.426 | 0.730 | 0.870 | 0.897 |
|        | avg      | 1      | 0.452     | 0.669 | 38.383    | 10.050 | 0.428 | 0.729 | 0.871 | 0.897 |
|        |          | 2      | 0.453     | 0.673 | 38.471    | 9.968  | 0.431 | 0.687 | 0.873 | 0.898 |
|        |          | 3      | 0.454     | 0.673 | 38.359    | 9.980  | 0.431 | 0.687 | 0.873 | 0.899 |
|        |          | 4      | 0.454     | 0.672 | 38.307    | 10.018 | 0.432 | 0.687 | 0.873 | 0.899 |
|        |          | 5      | 0.454     | 0.672 | 38.309    | 10.016 | 0.432 | 0.686 | 0.873 | 0.899 |
|        |          | 6      | 0.454     | 0.672 | 38.307    | 10.020 | 0.432 | 0.686 | 0.873 | 0.899 |
|        |          | 7      | 0.454     | 0.672 | 38.295    | 9.988  | 0.432 | 0.687 | 0.873 | 0.900 |
|        |          | 8      | 0.454     | 0.672 | 38.292    | 9.993  | 0.431 | 0.687 | 0.873 | 0.900 |
|        |          | 9      | 0.454     | 0.672 | 38.285    | 10.011 | 0.432 | 0.687 | 0.873 | 0.899 |
|        |          | 10     | 0.454     | 0.672 | 38.296    | 9.995  | 0.431 | 0.687 | 0.873 | 0.899 |

**Table D7:** Performance of semantic entailment depending on axioms, aggregation strategy and number of models for DeepGOGATMF-SE-Pred model
